# Supplementary material for: MicroRNA-17-92a-1 Host Gene (MIR17HG) Expression Signature and rs4284505 Variant Association with Alopecia Areata: A Case–Control Study
Source: MDPI journal article supplement (doi:10.3390/genes13030505), 2022-03-12
Supplement: s1 [file s1]

**Supplementary Table S1. MicroRNA 17-92a cluster is involved in hair follicle related gene ontology (GO) terms**

| Go term                     | ID           | Rank | microRNA   | # genes | Target genes   | Method    | P value  |
|-----------------------------|--------------|------|------------|---------|----------------|-----------|----------|
| Hair cycle process          | GO: 00224405 | 6    | miR-20a-3p | 2       | <b>SOX18</b>   | HITS-CLIP | 1.21E-07 |
|                             |              |      |            |         | <b>CTNNB1</b>  | HITS-CLIP |          |
|                             |              | 9    | miR-17-3P  | 2       | <b>ERCC2</b>   | HITS-CLIP | 1.21E-07 |
|                             |              |      |            |         | <b>CTNNB1</b>  | Multiple  |          |
|                             |              | 132  | miR-92a-3p | 6       | <b>DICER1</b>  | Multiple  | 5.24E-04 |
|                             |              |      |            |         | <b>CELSR1</b>  |           |          |
|                             |              |      |            |         | <b>FZD6</b>    | HITS-CLIP |          |
|                             |              |      |            |         | <b>TP63</b>    |           |          |
|                             |              |      |            |         | <b>VANGL2</b>  |           |          |
|                             |              |      |            |         | <b>AARS</b>    | Multiple  |          |
| Hair follicle development   | GO: 0001942  | 43   | miR-92a-3p | 6       | <b>DICER1</b>  | Multiple  | 2.86E-11 |
|                             |              |      |            |         | <b>CELSR1</b>  |           |          |
|                             |              |      |            |         | <b>FZD6</b>    | HITS-CLIP |          |
|                             |              |      |            |         | <b>TP63</b>    |           |          |
|                             |              |      |            |         | <b>VANGL2</b>  |           |          |
|                             |              |      |            |         | <b>AARS</b>    | Multiple  |          |
|                             |              | 60   | miR-19a-3p | 6       | <b>DICER1</b>  | Multiple  | 2.86E-11 |
|                             |              |      |            |         | <b>CELSR1</b>  | HITS-CLIP |          |
|                             |              |      |            |         | <b>FZD6</b>    | HITS-CLIP |          |
|                             |              |      |            |         | <b>INHBA</b>   | PAR-CLIP  |          |
|                             |              |      |            |         | <b>EDARADD</b> | Multiple  |          |
|                             |              |      |            |         | <b>DKK1</b>    | HITS-CLIP |          |
|                             |              | 127  | miR-19b-3p | 4       | <b>DICER1</b>  | Multiple  | 3.25E-07 |
|                             |              |      |            |         | <b>CELSR1</b>  | HITS-CLIP |          |
|                             |              |      |            |         | <b>INHBA</b>   | PAR-CLIP  |          |
|                             |              |      |            |         | <b>EDARADD</b> | Multiple  |          |
|                             |              | 117  | miR-20a-5p | 4       | <b>DICER1</b>  | HITS-CLIP | 3.25E-07 |
|                             |              |      |            |         | <b>ACVR1B</b>  | Multiple  |          |
|                             |              |      |            |         | <b>FZD6</b>    | PAR-CLIP  |          |
|                             |              |      |            |         | <b>CD109</b>   | HITS-CLIP |          |
|                             |              | 154  | miR-18a-3p | 3       | <b>DICER1</b>  | Multiple  | 2.49E-05 |
|                             |              |      |            |         | <b>FZD3</b>    | PAR-CLIP  |          |
|                             |              |      |            |         | <b>EDARADD</b> |           |          |
|                             |              | 174  | miR-17-5p  | 3       | <b>DICER1</b>  | Multiple  | 2.49E-05 |
|                             |              |      |            |         | <b>FZD6</b>    | Multiple  |          |
|                             |              |      |            |         | <b>TFAP2C</b>  | Multiple  |          |
| Hair follicle morphogenesis | GO: 0031069  | 11   | miR-17-3p  | 6       | <b>IGFBP5</b>  | HITS-CLIP | 2.98E-13 |
|                             |              |      |            |         | <b>DICER1</b>  | Multiple  |          |
|                             |              |      |            |         | <b>BCL2</b>    | PAR-CLIP  |          |
|                             |              |      |            |         | <b>NOTCH1</b>  | HITS-CLIP |          |
|                             |              |      |            |         | <b>CTNNB1</b>  | Multiple  |          |
|                             |              |      |            |         | <b>CDC42</b>   | HITS-CLIP |          |
|                             |              | 48   | miR-17-5p  | 5       | <b>IGFBP5</b>  | PAR-CLIP  |          |
|                             |              |      |            |         | <b>DICER1</b>  | Multiple  |          |
|                             |              |      |            |         | <b>RUNX1</b>   | Multiple  |          |
|                             |              |      |            |         | <b>BCL2</b>    | Multiple  |          |
|                             |              |      |            |         | <b>RUNX3</b>   | Multiple  |          |

|                                  |             |     |              |   |                 |           |          |
|----------------------------------|-------------|-----|--------------|---|-----------------|-----------|----------|
|                                  |             | 63  | miR-92a-3p   | 4 | <b>IGFBP5</b>   | HITS-CLIP | 1.60E-08 |
|                                  |             |     |              |   | <b>DICER1</b>   | Multiple  |          |
|                                  |             |     |              |   | <b>TP63</b>     |           |          |
|                                  |             |     |              |   | <b>CTNNB1</b>   | Multiple  |          |
|                                  |             | 202 | miR-18a      | 2 | <b>DICER1</b>   | Multiple  | 3.19E-04 |
|                                  |             |     |              |   | <b>RUNX1</b>    | Multiple  |          |
|                                  |             | 269 | miR-19a-3p   | 2 | <b>DICER1</b>   | Multiple  | 3.19E-04 |
|                                  |             |     |              |   | <b>FGF7</b>     | HITS-CLIP |          |
|                                  |             | 372 | miR-18a-3p   | 1 | <b>DICER1</b>   | Multiple  | 2.54E-02 |
|                                  |             | 506 | miR-92a-1-5p | 1 | <b>DICER1</b>   | PAR-CLIP  | 2.54E-02 |
| Hair follicle cell proliferation | GO: 0071335 | 54  | miR-92a-1-5p | 1 | <b>DICER1</b>   | Multiple  | 3.28E-05 |
|                                  |             | 95  | miR-19b-3p   | 1 | <b>DICER1</b>   | Multiple  | 3.28E-05 |
|                                  |             | 98  | miR-18a-3p   | 1 | <b>DICER1</b>   | Multiple  | 3.28E-05 |
|                                  |             | 120 | miR-19a-3p   | 1 | <b>DICER1</b>   | Multiple  | 3.28E-05 |
|                                  |             | 148 | miR-17-5p    | 1 | <b>DICER1</b>   | Multiple  | 3.28E-05 |
|                                  |             | 206 | miR-17-3p    | 1 | <b>DICER1</b>   | Multiple  | 3.28E-05 |
|                                  |             | 208 | miR-20a-5p   | 1 | <b>DICER1</b>   | Multiple  | 3.28E-05 |
| Hair follicle placode formation  | GO: 0060789 | 1   | miR-17-3p    | 5 | <b>GNAS</b>     | Multiple  | 2.99E-18 |
|                                  |             |     |              |   | <b>HDAC1</b>    | PAR-CLIP  |          |
|                                  |             |     |              |   | <b>CTNNB1</b>   | Multiple  |          |
|                                  |             |     |              |   | <b>HDAC2</b>    | HITS-CLIP |          |
|                                  |             |     |              |   | <b>CDC42</b>    | HITS-CLIP |          |
|                                  |             | 6   | miR-92a-3p   | 3 | <b>HDAC1</b>    | PAR-CLIP  | 1.22E-10 |
|                                  |             |     |              |   | <b>CTNNB1</b>   | Multiple  |          |
|                                  |             |     |              |   | <b>HDAC2</b>    | PAR-CLIP  |          |
|                                  |             | 139 | miR-18a-3p   | 1 |                 |           | 9.91E-04 |
|                                  |             | 225 | miR-17-5p    | 1 |                 |           | 9.91E-04 |
|                                  |             | 228 | 20a-3p       | 1 | <b>CTNNB1</b>   | HITS-CLIP | 9.91E-04 |
| Hair follicle maturation         | GO: 0048820 | 1   | miR-17-5p    | 2 | <b>ERCC2</b>    | HITS-CLIP | 1.89E-09 |
|                                  |             |     |              |   | <b>RBPJ</b>     | Multiple  |          |
|                                  |             | 14  | miR-92a-3p   | 1 | <b>RBPJ</b>     | Multiple  | 7.37E-05 |
|                                  |             | 31  | miR-92a-1-5p | 1 | <b>RBPJ</b>     | Multiple  | 7.37E-05 |
|                                  |             | 33  | miR-18a-3p   | 1 | <b>RBPJ</b>     | HITS-CLIP | 7.37E-05 |
|                                  |             | 68  | miR-18a-5p   | 1 | <b>RBPJ</b>     | HITS-CLIP | 7.37E-05 |
|                                  |             | 117 | miR-19b-3p   | 1 | <b>RBPJ</b>     | HITS-CLIP | 7.37E-05 |
|                                  |             | 126 | miR-17-3p    | 1 | <b>ERCC2</b>    | HITS-CLIP | 7.37E-05 |
|                                  |             | 128 | miR-20a-5p   | 1 | <b>RBPJ</b>     | HITS-CLIP | 7.37E-05 |
| Hair cell differentiation        | GO: 0035315 | 13  | miR-17-3p    | 2 | <b>ERCC2</b>    | HITS-CLIP | 1.55E-07 |
|                                  |             |     |              |   | <b>CTNNB1</b>   | Multiple  |          |
|                                  |             | 23  | miR-19b-1-5p | 1 | <b>ERCC3</b>    | Multiple  | 5.92E-04 |
|                                  |             | 36  | miR-92a-3p   | 1 | <b>ERCC3</b>    | Multiple  | 5.92E-04 |
|                                  |             | 100 | miR-17-5p    | 1 | <b>ERCC2</b>    | Multiple  | 5.92E-04 |
|                                  |             | 122 | miR-19a-5p   | 1 | <b>ERCC3</b>    | PAR-CLIP  | 5.92E-04 |
| Hair cycle                       | GO: 0042633 | 25  | miR-92a-3p   | 1 | <b>SNRPE</b>    | HITS-CLIP | 2.23E-03 |
|                                  |             | 87  | miR-17-5p    | 1 | <b>PPP1R13L</b> | HITS-CLIP | 2.23E-03 |

**Supplementary Table S2. Functional enrichment analysis of the microRNAs 17-92a cluster**

| KEGG pathway                                             | p-value         | #genes | #miRNAs |
|----------------------------------------------------------|-----------------|--------|---------|
| Proteoglycans in cancer                                  | <b>1.0e-325</b> | 97     | 6       |
| TGF-beta signaling pathway                               | <b>4.55E-15</b> | 43     | 7       |
| Chronic myeloid leukemia                                 | <b>7.54E-13</b> | 46     | 6       |
| Hepatitis B                                              | <b>7.83E-13</b> | 68     | 4       |
| Glioma                                                   | <b>1.22E-11</b> | 32     | 4       |
| Hippo signaling pathway                                  | <b>1.95E-11</b> | 72     | 7       |
| Adherens junction                                        | <b>4.48E-11</b> | 38     | 5       |
| Viral carcinogenesis                                     | <b>1.08E-10</b> | 75     | 5       |
| Pathways in cancer                                       | <b>1.09E-10</b> | 139    | 4       |
| Cell cycle                                               | <b>7.91E-10</b> | 52     | 6       |
| FoxO signaling pathway                                   | <b>3.96E-09</b> | 63     | 4       |
| Thyroid hormone signaling pathway                        | <b>6.66E-09</b> | 63     | 4       |
| Bladder cancer                                           | <b>1.37E-08</b> | 27     | 6       |
| p53 signaling pathway                                    | <b>1.79E-08</b> | 37     | 5       |
| Bacterial invasion of epithelial cells                   | <b>2.03E-08</b> | 39     | 4       |
| ECM-receptor interaction                                 | <b>2.26E-08</b> | 18     | 2       |
| Fatty acid biosynthesis                                  | <b>2.95E-08</b> | 1      | 1       |
| Prion diseases                                           | <b>3.80E-08</b> | 6      | 1       |
| Colorectal cancer                                        | <b>5.34E-07</b> | 35     | 4       |
| Prostate cancer                                          | <b>1.42E-06</b> | 41     | 3       |
| Focal adhesion                                           | <b>2.19E-06</b> | 90     | 5       |
| Regulation of actin cytoskeleton                         | <b>3.13E-06</b> | 86     | 5       |
| Prolactin signaling pathway                              | <b>3.95E-06</b> | 34     | 3       |
| Pancreatic cancer                                        | <b>3.32E-05</b> | 31     | 3       |
| Lysine degradation                                       | <b>4.76E-05</b> | 18     | 5       |
| Signaling pathways regulating pluripotency of stem cells | <b>4.99E-05</b> | 62     | 4       |
| Protein processing in endoplasmic reticulum              | <b>5.92E-05</b> | 55     | 2       |
| Sphingolipid signaling pathway                           | <b>7.53E-05</b> | 49     | 3       |
| RNA transport                                            | <b>0.000102</b> | 58     | 3       |
| Melanoma                                                 | <b>0.000134</b> | 25     | 3       |
| RNA degradation                                          | <b>0.000135</b> | 30     | 5       |
| mTOR signaling pathway                                   | <b>0.000213</b> | 28     | 3       |
| Transcriptional misregulation in cancer                  | <b>0.000319</b> | 55     | 3       |
| mRNA surveillance pathway                                | <b>0.00034</b>  | 36     | 2       |
| Sphingolipid metabolism                                  | <b>0.000607</b> | 8      | 2       |
| Non-small cell lung cancer                               | <b>0.000611</b> | 26     | 3       |
| Fatty acid metabolism                                    | <b>0.002094</b> | 9      | 3       |
| Insulin signaling pathway                                | <b>0.002313</b> | 52     | 3       |
| Renal cell carcinoma                                     | <b>0.002908</b> | 26     | 2       |
| Estrogen signaling pathway                               | <b>0.004091</b> | 40     | 3       |
| Ubiquitin mediated proteolysis                           | <b>0.004364</b> | 46     | 3       |
| Endometrial cancer                                       | <b>0.005013</b> | 24     | 2       |
| Circadian rhythm                                         | <b>0.005096</b> | 15     | 3       |
| Thyroid cancer                                           | <b>0.006483</b> | 16     | 4       |
| Small cell lung cancer                                   | <b>0.007543</b> | 26     | 2       |
| Shigellosis                                              | <b>0.008276</b> | 19     | 1       |

|                                               |                 |    |   |
|-----------------------------------------------|-----------------|----|---|
| <b>Fatty acid elongation</b>                  | <b>0.008908</b> | 2  | 1 |
| <b>Central carbon metabolism in cancer</b>    | <b>0.012451</b> | 23 | 2 |
| <b>Axon guidance</b>                          | <b>0.01594</b>  | 42 | 3 |
| <b>Oocyte meiosis</b>                         | <b>0.016976</b> | 32 | 2 |
| <b>Adrenergic signaling in cardiomyocytes</b> | <b>0.017312</b> | 44 | 3 |
| <b>Neurotrophin signaling pathway</b>         | <b>0.020944</b> | 38 | 2 |
| <b>Long-term depression</b>                   | <b>0.024704</b> | 19 | 3 |
| <b>Endocytosis</b>                            | <b>0.031641</b> | 62 | 3 |
| <b>Acute myeloid leukemia</b>                 | <b>0.042271</b> | 23 | 3 |
| <b>PI3K-Akt signaling pathway</b>             | <b>0.046219</b> | 96 | 3 |

| GO Category                                                             | p-value  | #genes | #miRNAs |
|-------------------------------------------------------------------------|----------|--------|---------|
| transforming growth factor beta receptor signaling pathway              | 0        | 80     | 4       |
| cellular component disassembly involved in execution phase of apoptosis | 0        | 30     | 5       |
| platelet activation                                                     | 0        | 70     | 5       |
| innate immune response                                                  | 0        | 199    | 5       |
| phosphatidylinositol-mediated signaling                                 | 0        | 46     | 5       |
| positive regulation of protein insertion into mitochondrial membrane    | 0        | 21     | 5       |
| G2/M transition of mitotic cell cycle                                   | 0        | 65     | 6       |
| Fc-gamma receptor signaling pathway involved in phagocytosis            | 0        | 41     | 6       |
| immune system process                                                   | 0        | 436    | 7       |
| transcription initiation from RNA polymerase II promoter                | 0        | 92     | 7       |
| fibroblast growth factor receptor signaling pathway                     | 0        | 76     | 7       |
| protein complex assembly                                                | 0        | 259    | 8       |
| blood coagulation                                                       | 0        | 174    | 8       |
| intrinsic apoptotic signaling pathway                                   | 0        | 36     | 8       |
| DNA metabolic process                                                   | 0        | 282    | 9       |
| transcription, DNA-templated                                            | 0        | 750    | 9       |
| epidermal growth factor receptor signaling pathway                      | 0        | 85     | 9       |
| cellular component assembly                                             | 0        | 445    | 9       |
| mitotic cell cycle                                                      | 0        | 206    | 10      |
| cellular protein modification process                                   | 0        | 925    | 10      |
| response to stress                                                      | 0        | 768    | 10      |
| biological_process                                                      | 0        | 4652   | 10      |
| cell death                                                              | 0        | 366    | 10      |
| catabolic process                                                       | 0        | 742    | 10      |
| biosynthetic process                                                    | 0        | 1441   | 10      |
| gene expression                                                         | 0        | 343    | 10      |
| viral process                                                           | 0        | 268    | 10      |
| RNA metabolic process                                                   | 0        | 122    | 10      |
| mRNA metabolic process                                                  | 0        | 114    | 10      |
| cellular nitrogen compound metabolic process                            | 0        | 1784   | 10      |
| nucleobase-containing compound catabolic process                        | 0        | 371    | 10      |
| Fc-epsilon receptor signaling pathway                                   | 0        | 80     | 10      |
| cellular protein metabolic process                                      | 0        | 214    | 10      |
| small molecule metabolic process                                        | 0        | 799    | 10      |
| symbiosis, encompassing mutualism through parasitism                    | 0        | 296    | 10      |
| neurotrophin TRK receptor signaling pathway                             | 0        | 134    | 10      |
| membrane organization                                                   | 0        | 261    | 10      |
| macromolecular complex assembly                                         | 0        | 330    | 10      |
| cellular lipid metabolic process                                        | 1.11E-16 | 65     | 8       |
| cell cycle                                                              | 7.77E-16 | 282    | 6       |
| toll-like receptor 10 signaling pathway                                 | 6.77E-15 | 31     | 6       |
| mRNA processing                                                         | 1.41E-14 | 183    | 9       |
| viral life cycle                                                        | 1.74E-13 | 50     | 8       |
| nucleocytoplasmic transport                                             | 3.92E-13 | 113    | 5       |
| toll-like receptor TLR1:TLR2 signaling pathway                          | 6.69E-13 | 30     | 6       |
| toll-like receptor TLR6:TLR2 signaling pathway                          | 6.69E-13 | 30     | 6       |

|                                                                         |          |     |   |
|-------------------------------------------------------------------------|----------|-----|---|
| G1/S transition of mitotic cell cycle                                   | 9.76E-13 | 79  | 7 |
| insulin receptor signaling pathway                                      | 1.16E-12 | 59  | 4 |
| chromatin organization                                                  | 2.01E-12 | 56  | 6 |
| toll-like receptor 5 signaling pathway                                  | 2.73E-12 | 31  | 6 |
| TRIF-dependent toll-like receptor signaling pathway                     | 4.73E-12 | 34  | 6 |
| activation of signaling protein activity involved in unfolded protein r | 8.98E-12 | 32  | 5 |
| toll-like receptor 9 signaling pathway                                  | 1.36E-11 | 32  | 6 |
| nuclear-transcribed mRNA catabolic process, deadenylation-depend        | 1.66E-11 | 27  | 6 |
| DNA damage response, signal transduction by p53 class mediator re       | 1.79E-11 | 38  | 6 |
| apoptotic signaling pathway                                             | 1.93E-11 | 53  | 5 |
| mitotic nuclear envelope disassembly                                    | 3.15E-11 | 20  | 5 |
| platelet degranulation                                                  | 8.75E-11 | 25  | 4 |
| termination of RNA polymerase II transcription                          | 3.09E-10 | 25  | 6 |
| regulation of transcription from RNA polymerase II promoter in resp     | 3.24E-10 | 15  | 4 |
| MyD88-independent toll-like receptor signaling pathway                  | 5.36E-10 | 30  | 5 |
| stress-activated MAPK cascade                                           | 6.26E-10 | 26  | 4 |
| cytoskeleton organization                                               | 1.17E-09 | 155 | 4 |
| cell junction organization                                              | 1.29E-09 | 48  | 3 |
| ribonucleoprotein complex assembly                                      | 2.88E-09 | 43  | 4 |
| in utero embryonic development                                          | 5.49E-09 | 108 | 4 |
| RNA splicing                                                            | 1.31E-08 | 101 | 6 |
| toll-like receptor 3 signaling pathway                                  | 2.98E-08 | 28  | 4 |
| toll-like receptor 2 signaling pathway                                  | 3.54E-08 | 26  | 4 |
| toll-like receptor 4 signaling pathway                                  | 3.55E-08 | 38  | 6 |
| apoptotic process                                                       | 3.77E-08 | 195 | 3 |
| toll-like receptor signaling pathway                                    | 4.15E-08 | 35  | 4 |
| vesicle-mediated transport                                              | 6.81E-08 | 210 | 3 |
| cellular component movement                                             | 7.09E-08 | 36  | 4 |
| negative regulation of transcription from RNA polymerase II promot      | 1.11E-07 | 232 | 4 |
| cell cycle arrest                                                       | 1.18E-07 | 43  | 2 |
| NLS-bearing protein import into nucleus                                 | 2.32E-07 | 11  | 7 |
| transcription from RNA polymerase II promoter                           | 4.43E-07 | 147 | 4 |
| regulation of ubiquitin-protein ligase activity involved in mitotic cel | 4.56E-07 | 31  | 5 |
| protein polyubiquitination                                              | 4.81E-07 | 55  | 4 |
| intracellular transport of virus                                        | 5.05E-07 | 11  | 5 |
| mRNA 3'-end processing                                                  | 6.36E-07 | 20  | 3 |
| post-translational protein modification                                 | 1.03E-06 | 55  | 4 |
| positive regulation of ubiquitin-protein ligase activity involved in m  | 2.02E-06 | 28  | 4 |
| hexose transport                                                        | 3.98E-06 | 22  | 6 |
| generation of precursor metabolites and energy                          | 7.36E-06 | 89  | 5 |
| protein targeting                                                       | 1.06E-05 | 70  | 4 |
| regulation of glucose transport                                         | 1.14E-05 | 17  | 5 |
| mRNA splicing, via spliceosome                                          | 1.19E-05 | 65  | 4 |
| negative regulation of transcription, DNA-templated                     | 1.29E-05 | 168 | 3 |
| positive regulation of apoptotic process                                | 1.39E-05 | 118 | 3 |
| protein ubiquitination                                                  | 2.27E-05 | 123 | 3 |
| antigen processing and presentation of exogenous peptide antigen v      | 4.05E-05 | 37  | 4 |
| cell proliferation                                                      | 7.3E-05  | 135 | 3 |
| JAK-STAT cascade involved in growth hormone signaling pathway           | 7.36E-05 | 13  | 3 |
| nuclear-transcribed mRNA poly(A) tail shortening                        | 8.5E-05  | 15  | 4 |

|                                                                                    |          |     |   |
|------------------------------------------------------------------------------------|----------|-----|---|
| androgen receptor signaling pathway                                                | 8.68E-05 | 25  | 4 |
| endoplasmic reticulum unfolded protein response                                    | 9.74E-05 | 32  | 3 |
| protein N-linked glycosylation via asparagine                                      | 0.000111 | 28  | 3 |
| axon guidance                                                                      | 0.000131 | 106 | 3 |
| positive regulation of transcription, DNA-templated                                | 0.000179 | 214 | 4 |
| MyD88-dependent toll-like receptor signaling pathway                               | 0.000203 | 26  | 3 |
| nucleotide-binding domain, leucine rich repeat containing receptor                 | 0.000395 | 14  | 3 |
| cell motility                                                                      | 0.000411 | 73  | 2 |
| cell junction assembly                                                             | 0.000486 | 20  | 2 |
| regulation of defense response to virus by virus                                   | 0.00053  | 13  | 3 |
| negative regulation of cell proliferation                                          | 0.000695 | 112 | 2 |
| regulation of cell cycle                                                           | 0.000855 | 52  | 3 |
| regulation of nitric-oxide synthase activity                                       | 0.001055 | 5   | 2 |
| negative regulation of transforming growth factor beta receptor signaling pathway  | 0.00129  | 35  | 3 |
| positive regulation of nuclear-transcribed mRNA catabolic process, cytoplasmic     | 0.001311 | 8   | 2 |
| anaphase-promoting complex-dependent proteasomal ubiquitin-dependent proteolysis   | 0.001314 | 22  | 2 |
| regulation of cellular amino acid metabolic process                                | 0.001463 | 16  | 2 |
| Notch signaling pathway                                                            | 0.001474 | 48  | 3 |
| signal transduction                                                                | 0.001648 | 774 | 2 |
| extracellular matrix organization                                                  | 0.001679 | 53  | 2 |
| post-Golgi vesicle-mediated transport                                              | 0.001787 | 10  | 2 |
| positive regulation of nuclear-transcribed mRNA poly(A) tail shortening            | 0.0018   | 8   | 4 |
| nitric oxide metabolic process                                                     | 0.002048 | 4   | 2 |
| extracellular matrix disassembly                                                   | 0.002346 | 29  | 3 |
| activation of MAPKK activity                                                       | 0.00252  | 27  | 3 |
| glycerophospholipid biosynthetic process                                           | 0.002782 | 19  | 3 |
| negative regulation of ubiquitin-protein ligase activity involved in morphogenesis | 0.0029   | 14  | 2 |
| COPII coating of Golgi vesicle                                                     | 0.003121 | 6   | 2 |
| nucleobase-containing small molecule metabolic process                             | 0.003443 | 21  | 2 |
| cellular response to hypoxia                                                       | 0.003892 | 35  | 3 |
| regulation of transcription involved in G1/S transition of mitotic cell cycle      | 0.004854 | 9   | 2 |
| leukocyte migration                                                                | 0.006869 | 25  | 2 |
| nuclear-transcribed mRNA catabolic process, nonsense-mediated decay                | 0.010482 | 19  | 1 |
| inositol phosphate metabolic process                                               | 0.012437 | 13  | 3 |
| SRP-dependent cotranslational protein targeting to membrane                        | 0.01485  | 11  | 2 |
| viral transcription                                                                | 0.016991 | 8   | 2 |
| negative regulation of translation                                                 | 0.01851  | 18  | 2 |
| protein maturation                                                                 | 0.020399 | 32  | 2 |
| anatomical structure morphogenesis                                                 | 0.021381 | 29  | 2 |
| stem cell maintenance                                                              | 0.023488 | 13  | 1 |
| positive regulation of viral transcription                                         | 0.024556 | 14  | 2 |
| negative regulation of apoptotic process                                           | 0.025377 | 73  | 1 |
| positive regulation of type I interferon production                                | 0.026091 | 9   | 1 |
| regulation of small GTPase mediated signal transduction                            | 0.033218 | 54  | 3 |
| virion assembly                                                                    | 0.036658 | 11  | 2 |
| protein import into nucleus                                                        | 0.048113 | 13  | 1 |
| viral protein processing                                                           | 0.049742 | 8   | 2 |

**Supplementary Table S3. Association of MIR17 rs4284505 genotypes and MIR17 expression with clinical features**

| Characteristics             |             | AA        | AG         | GG        | <i>p</i> - value | MIR-17 expression  | <i>p</i> - value |
|-----------------------------|-------------|-----------|------------|-----------|------------------|--------------------|------------------|
| Number                      |             | 38        | 136        | 74        |                  |                    |                  |
| Demographic characteristics |             |           |            |           |                  |                    |                  |
| Age, year                   | ≤30 years   | 17 (44.7) | 72 (52.9)  | 36 (48.6) | <0.001           | 17.7 (1.16-343)    | 0.169            |
|                             | >30 years   | 21 (55.3) | 64 (47.1)  | 38 (51.4) |                  | 58.3 (5.34-1068)   |                  |
| Sex                         | Male        | 35 (92.1) | 118 (86.8) | 63 (85.1) | 0.69             | 35.8 (2.02-470.4)  | 0.357            |
|                             | Female      | 3 (7.9)   | 18 (13.2)  | 11 (14.9) |                  | 6.15 (0.05-1906)   |                  |
| Obesity                     | Absent      | 33 (86.8) | 127 (93.4) | 69 (93.2) | 0.44             | 28.2 (1.68-476.3)  | 0.60             |
|                             | Present     | 5 (13.2)  | 9 (6.6)    | 5 (6.8)   |                  | 127 (11.4-568.9)   |                  |
| Residence                   | Port-said   | 1 (2.6)   | 7 (5.1)    | 5 (6.8)   | 0.07             | 476.3 (373-2704)   | 0.052            |
|                             | Suez        | 2 (5.3)   | 10 (7.4)   | 3 (4.1)   |                  | 85.9 (15.1-1429)   |                  |
|                             | Ismailia    | 12 (31.6) | 42 (30.9)  | 23 (31.1) |                  | 6.9 (0.56-66.2)    |                  |
|                             | Cairo       | 23 (60.5) | 77 (56.6)  | 43 (58.1) |                  | 43.5 (1.95-809)    |                  |
| Occupation                  | Student     | 18 (47.4) | 62 (45.6)  | 27 (36.5) | 0.005            | 22.5 (1.57-337.6)  | 0.553            |
|                             | Unemployed  | 19 (50)   | 56 (41.2)  | 33 (44.6) |                  | 27.9 (2.02-578.1)  |                  |
|                             | Employed    | 1 (2.6)   | 18 (13.2)  | 14 (18.9) |                  | 66.8 (3.1-2512)    |                  |
| Family history              | Alopecia    | 21 (55.3) | 63 (46.3)  | 24 (32.4) | 0.044            | 32.4 (1.68-1321)   | 0.534            |
|                             | Autoimmune  | 20 (52.6) | 60 (44.1)  | 25 (33.8) | 0.13             | 85.9 (1.68-1370)   | 0.304            |
| Prior episode of alopecia   | No          | 8 (21.1)  | 40 (29.4)  | 35 (47.3) | 0.007            | 36 (3.2-1784)      | 0.364            |
|                             | Yes         | 30 (78.9) | 96 (70.6)  | 39 (52.7) |                  | 22.6 (1.7-452.7)   |                  |
| Duration of disease         | ≤ 12 months | 32 (84.2) | 113 (83.1) | 65 (87.8) | 0.65             | 29.4 (1.7-494.8)   | 0.801            |
|                             | >12 months  | 6 (15.8)  | 23 (16.9)  | 9 (12.2)  |                  | 39.9 (3.5-657.7)   |                  |
| Age at onset                | ≤ 20 years  | 35 (92.1) | 127 (93.4) | 63 (85.1) | 0.13             | 28.2 (1.8-452.7)   | 0.471            |
|                             | >20 years   | 3 (7.9)   | 9 (6.6)    | 11 (14.9) |                  | 66.3 (0.4-3239.6)  |                  |
| Disease characteristics     |             |           |            |           |                  |                    |                  |
| Alopecia subtype            | Patchy      | 35 (92.1) | 118 (86.8) | 56 (75.7) | 0.038            | 13 (1.6-476.3)     | 0.165            |
|                             | Others      | 3 (7.9)   | 18 (13.2)  | 18 (24.3) |                  | 66.9 (18.7-2299.6) |                  |
| Nail changes                | Absent      | 27 (71.1) | 89 (65.4)  | 47 (63.5) | 0.72             | 35.7 (2.1-532.8)   | 0.93             |
|                             | Present     | 11 (28.9) | 47 (34.6)  | 27 (36.5) |                  | 27.8 (1.7-501.5)   |                  |
| Itching                     | Absent      | 31 (81.6) | 96 (70.6)  | 62 (83.8) | 0.07             | 36 (4.3-531.9)     | 0.070            |
|                             | Present     | 7 (18.4)  | 40 (29.4)  | 12 (16.2) |                  | 8 (0.1-532.8)      |                  |
| Scalp infection             | Absent      | 28 (73.7) | 90 (66.2)  | 64 (86.5) | 0.006            | 36 (1.7-452.7)     | 0.936            |



|                                |         |           |            |           |              |                    |              |
|--------------------------------|---------|-----------|------------|-----------|--------------|--------------------|--------------|
| Atopy                          | Present | 10 (26.3) | 46 (33.8)  | 10 (13.5) |              | 10.7 (1.9-810)     |              |
|                                | Absent  | 34 (89.5) | 98 (72.1)  | 57 (77)   | 0.08         | 36 (1.9-810)       | 0.522        |
| Hypertension                   | Present | 4 (10.5)  | 38 (27.9)  | 17 (23)   |              | 22.6 (1.3-228.4)   |              |
|                                | Absent  | 30 (78.9) | 127 (93.4) | 70 (94.6) | <b>0.010</b> | 27.8 (1.7-452.7)   | 0.262        |
| Emotional stress               | Present | 8 (21.1)  | 9 (6.6)    | 4 (5.4)   |              | 123 (1.7-2234.1)   |              |
|                                | Absent  | 8 (21.1)  | 38 (27.9)  | 14 (18.9) | 0.30         | 35.8 (1.9-1224.8)  | 0.580        |
| Concomitant autoimmune disease | Present | 30 (78.9) | 98 (72.1)  | 60 (81.1) |              | 29.4 (1.7-458.6)   |              |
|                                | Absent  | 22 (57.9) | 98 (72.1)  | 53 (71.6) | 0.22         | 9.7 (0.6-289.8)    | <b>0.049</b> |
| Responded to treatment         | Present | 16 (42.1) | 38 (27.9)  | 21 (28.4) |              | 112.6 (4.1-1189.6) |              |
|                                | No      | 5 (13.2)  | 44 (32.4)  | 16 (21.6) | <b>0.033</b> | 66.9 (1.7-1465.8)  | 0.189        |
|                                | Yes     | 33 (86.8) | 92 (67.6)  | 58 (78.4) |              | 11 (1.7-452.7)     |              |

Data are shown as number (percentage) or as medians (upper-lower limits). Chi-square and Fisher's Exact tests were used for categorical variables, and Mann-Whitney U test was applied for quantitative variables. Bold values indicate statistical significance at  $p$ -value < 0.05.

**Supplementary Table S4. Functional impact of MIR17HG polymorphism on regulatory regions.**

| Consequence type | Transcription factors                                                                                                        | Motif position | Motif score change           |
|------------------|------------------------------------------------------------------------------------------------------------------------------|----------------|------------------------------|
| TF binding site  | FOXO1::ELF1, FOXJ2::ELF1, FOXJ3::ELF1                                                                                        | 13 (out of 15) | Less like consensus sequence |
| TF binding site  | ELF1, ELF4, ELF5, ELF3, ELF2, ETV7                                                                                           | 3 (out of 12)  | More like consensus sequence |
| TF binding site  | ETV2::DLX3, HOXB2::ELF1, HOXB2::ELK3                                                                                         | 9 (out of 18)  | Less like consensus sequence |
| TF binding site  | E2F1::ELK1                                                                                                                   | 14 (out of 22) | Less like consensus sequence |
| TF binding site  | ETV2::PAX5, ELK1::PAX1, ELK1::PAX5, ELK1::PAX9                                                                               | 1 (out of 20)  | Less like consensus sequence |
| TF binding site  | HOXB2::ELF1                                                                                                                  | 8 (out of 17)  | Less like consensus sequence |
| TF binding site  | ETV2::HOXA2, FLI1::DLX2, HOXB2::ELF1, HOXB2::ELK3, ETV2::DRGX, ELK1::HOXA1, FLI1::DRGX, ETV5::DRGX, ETV5::HOXA2, HOXB2::ELK1 | 1 (out of 14)  | Less like consensus sequence |
| TF binding site  | HOXB2::ELF1                                                                                                                  | 13 (out of 22) | More like consensus sequence |
| TF binding site  | HOXA3::PAX5                                                                                                                  | 14 (out of 20) | Less like consensus sequence |

Motif position is the position of the variant within the motif, in base pair coordinates, from the start of the motif.

The motif scores are between 0 and 1. It indicates how strong a binding site it is for the transcription factor, with 1 the best and 0 the worst. The score change indicates whether the score increases or decreases and by how much as a result of the SNP. It indicates whether the SNP changes a base which is vital to the motif function or not.

Data source: ensembl.org

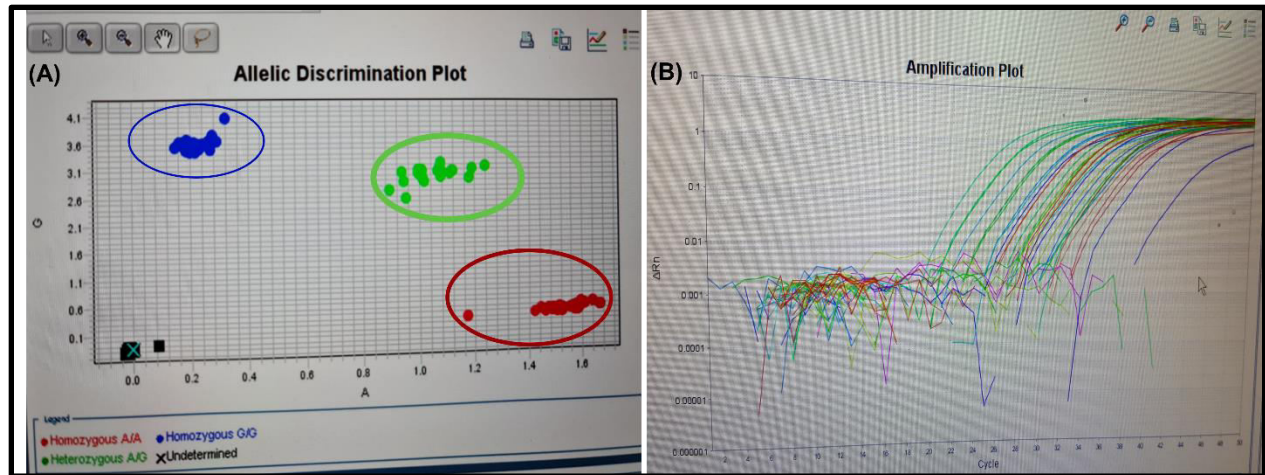

**Figure S1.** (A) Allele discrimination plot (single nucleotide polymorphism assay, rs4284505) using TaqMan genotyping polymerase chain reaction (StepOne Real-Time; Applied Biosystems, Thermo Fisher Scientific, Foster City, CA, USA). Alleles as homozygous A/A (lower right red cluster), heterozygous A/G (middle green cluster) and homozygous G/G (upper left blue cluster) were retrieved using allele calling software. The negative control samples were represented as black squares (x: undetermined) in the lower left corner of the plot. (B) Amplification plot for the quantification of MIR17HG by the Real-Time TaqMan® PCR assay shows log of change in gene expression plotted vs. PCR cycle number. This plot from the AB 7500HT instrument (Applied Biosystems, USA).
